# Supplementary material
Source: MDPI journal article supplement (https://www.mdpi.com/1424-8247/16/3/473)
Supplement: s1 [file s1]

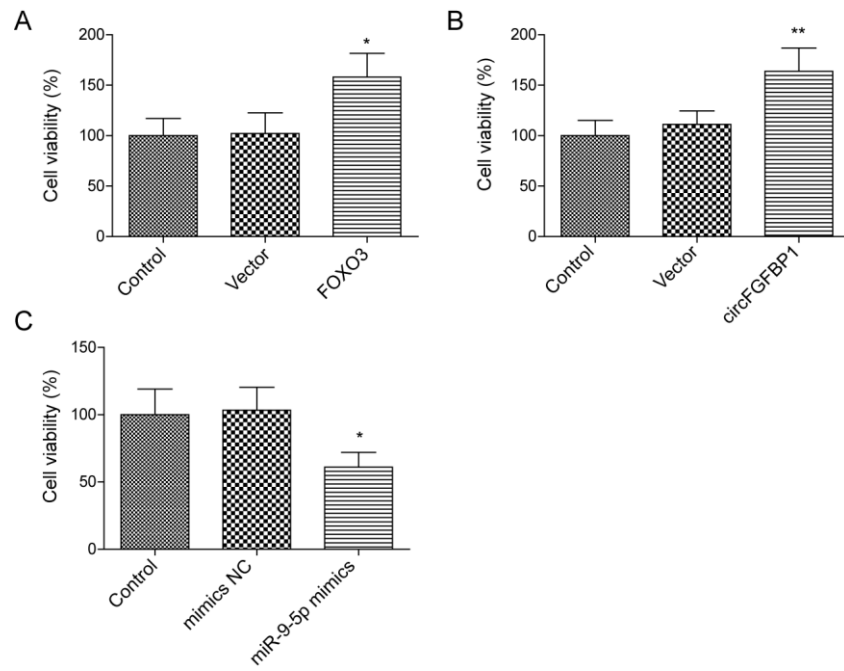

**Figure S1.** The effect of overexpression of FOXO3, circFGFBP1 and miR-9-5p on NP cell viability. (A-C) The role of overexpression of FOXO3 (A), circFGFBP1 (B) and miR-9-5p (C) in cell viability measured by CCK-8 assay. Data were estimated as mean  $\pm$  SD. \*  $p < 0.05$ , \*\*  $p < 0.01$ .
